# Supplementary material for: EU Citizens’ Twitter Discussions of the 2022–23 Energy Crisis: A Content and Sentiment Analysis on the Verge of a Daunting Winter
Source: MDPI journal article supplement (doi:10.3390/su15021322), 2023-01-10
Supplement: s1 [file s1]

## SUPPLEMENTARY MATERIAL

1. Visualizations of all Users Networks
2. Visualizations of all Semantic (word-pair) Networks

### 1. Visualizations of all networks

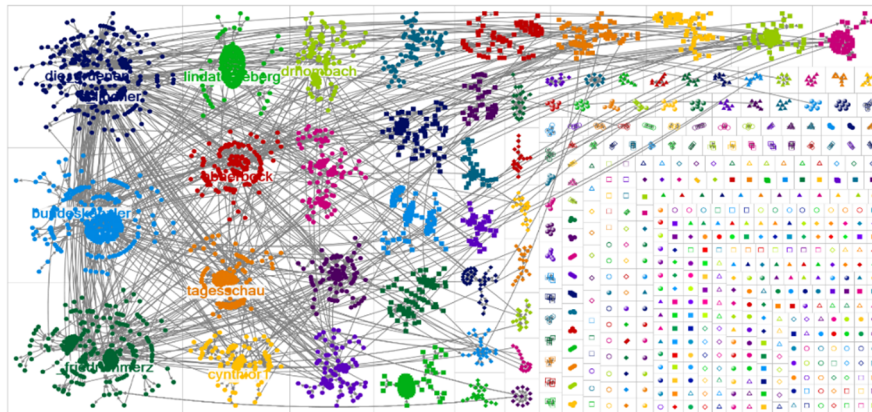

German, Sept. 6

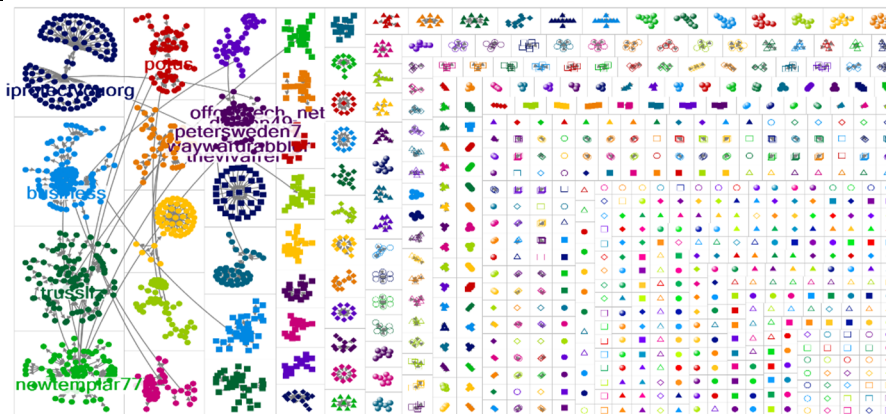

English, Sept. 6

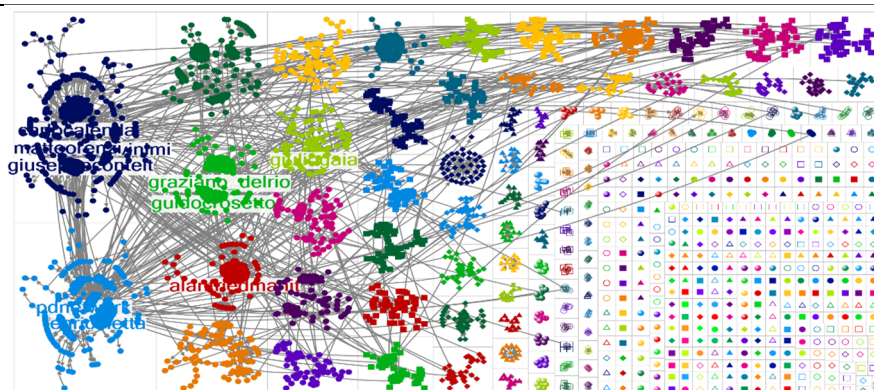

Italian, Sept. 6

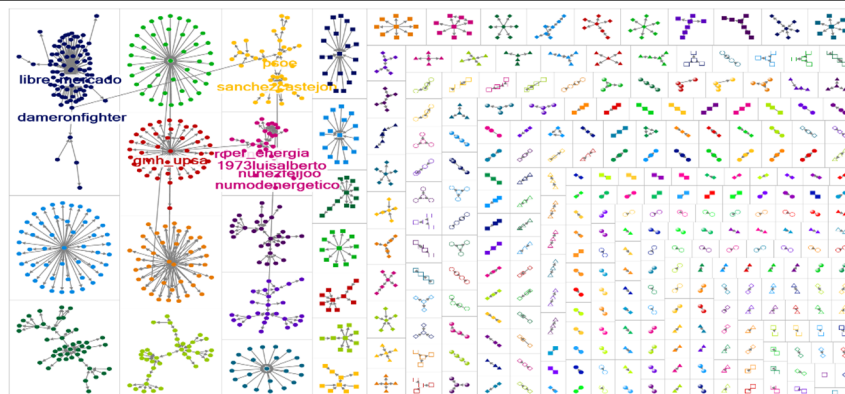

Spanish, Sept. 6

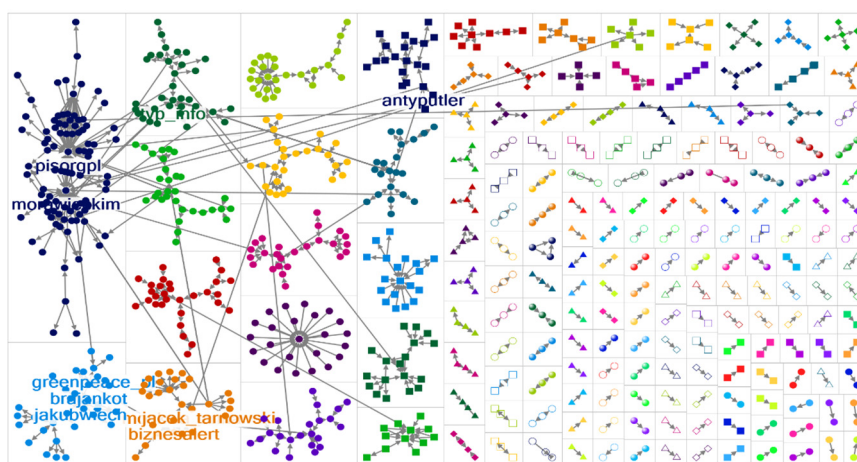

Polish, Sept. 6

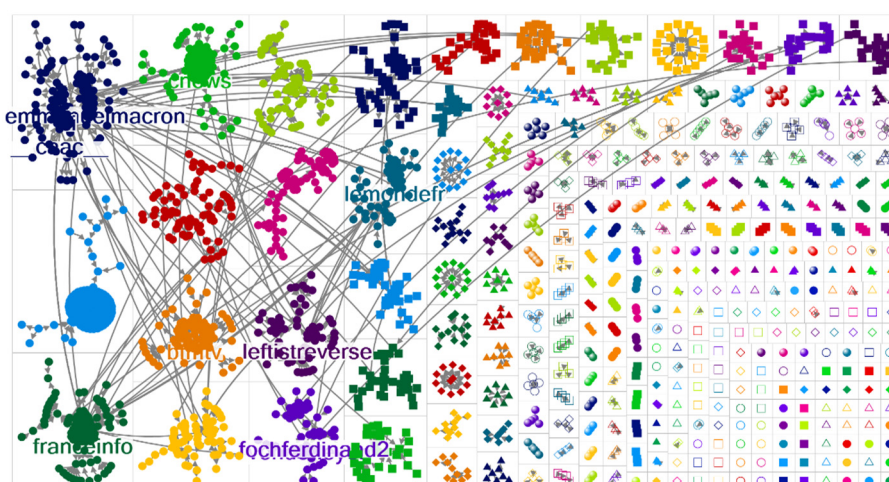

French, Sept. 13



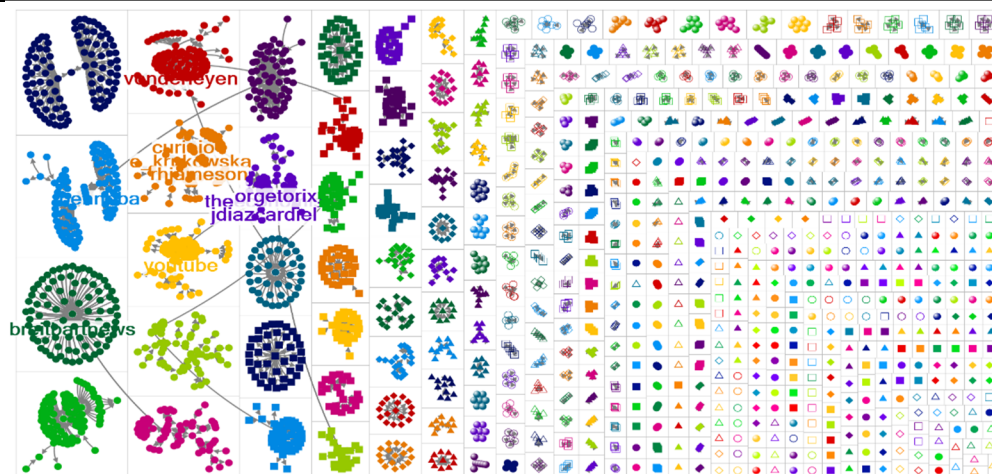

English, Sept. 13

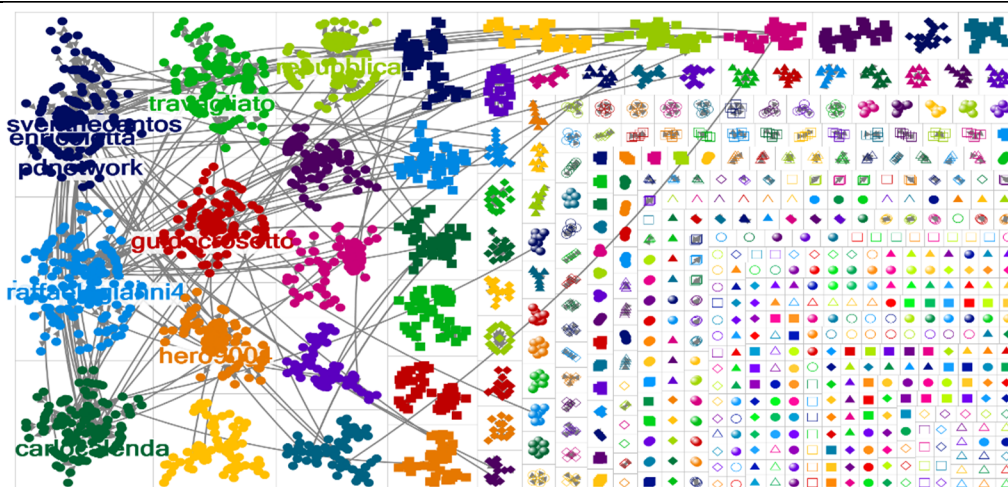

Italian, Sept. 13

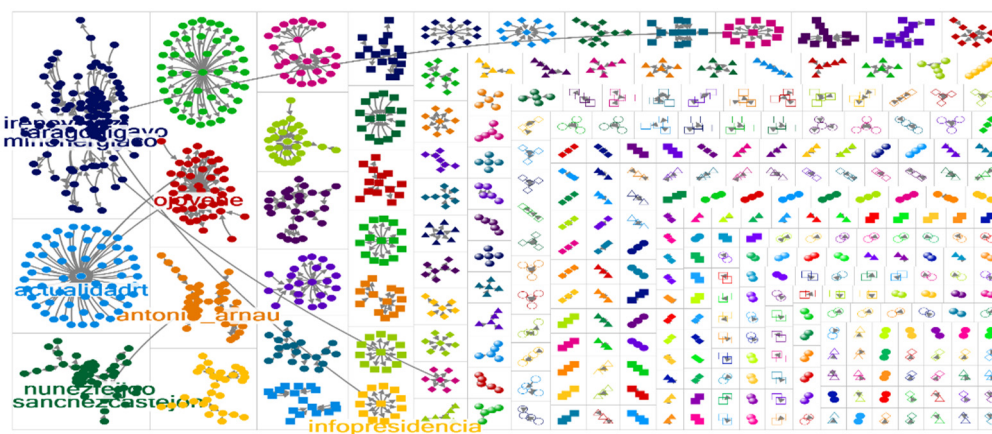

Spanish network 13/09

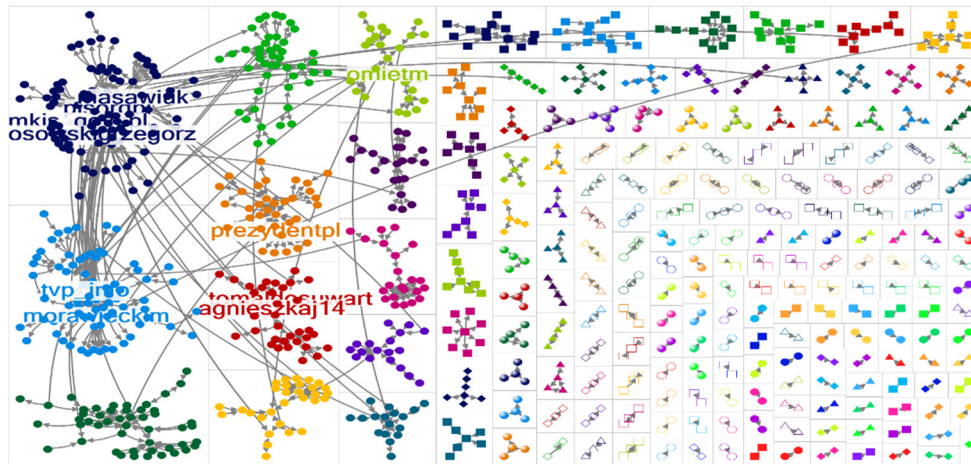

Polish, Sept. 13

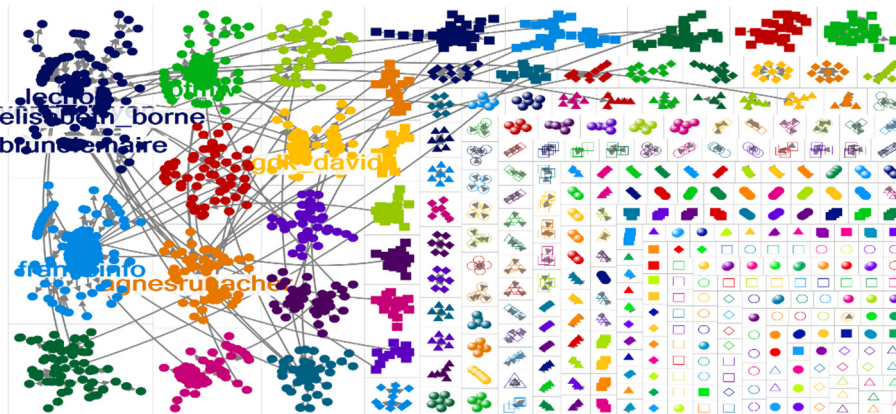

French, Sept. 21

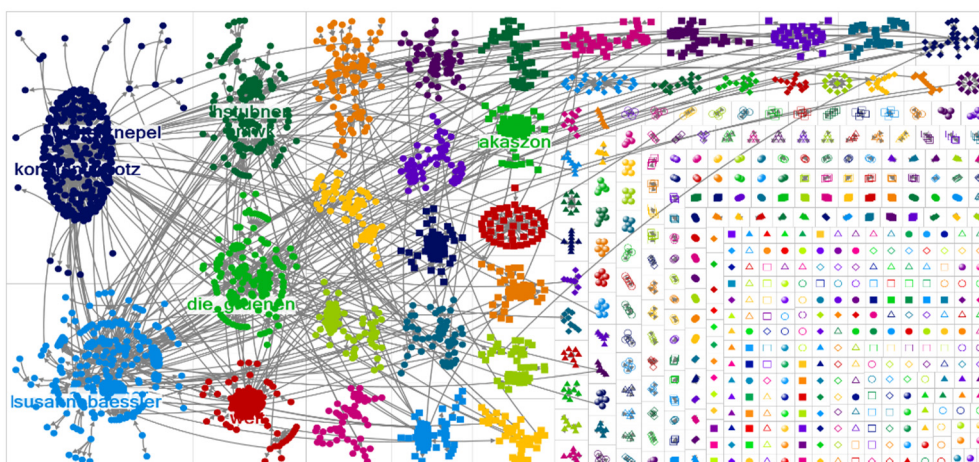

German, Sept. 21



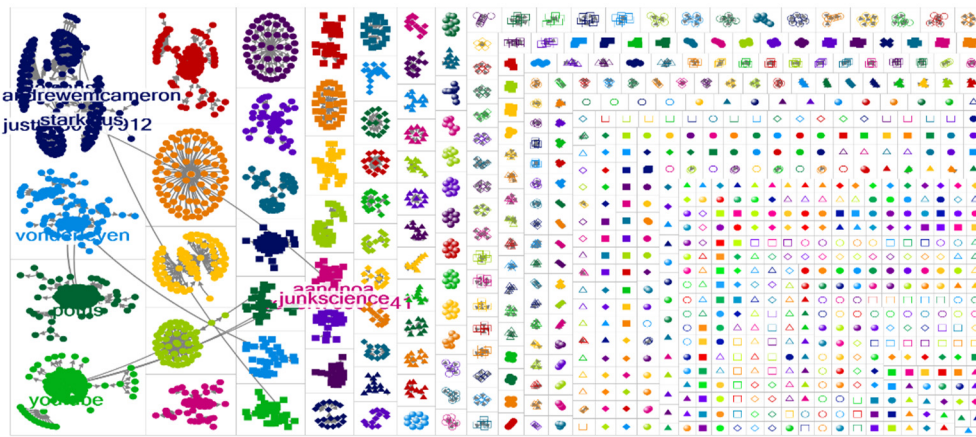

English, Sept. 21

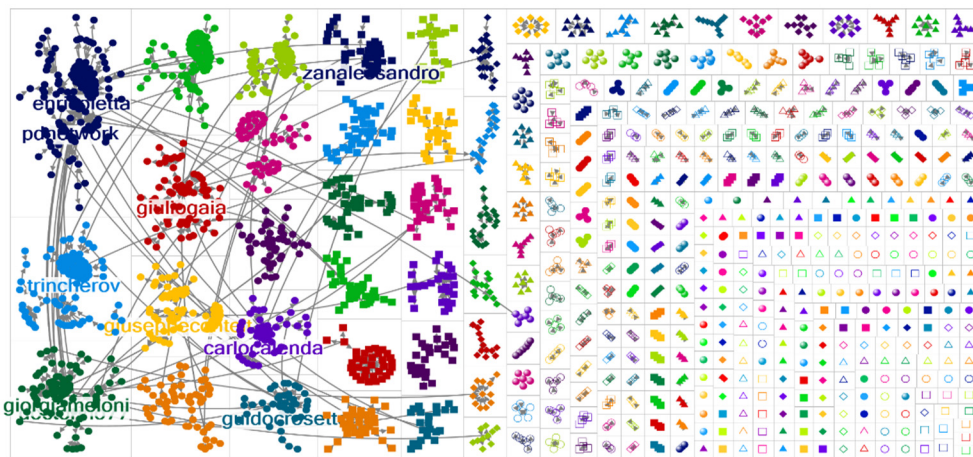

Italian, Sept. 21

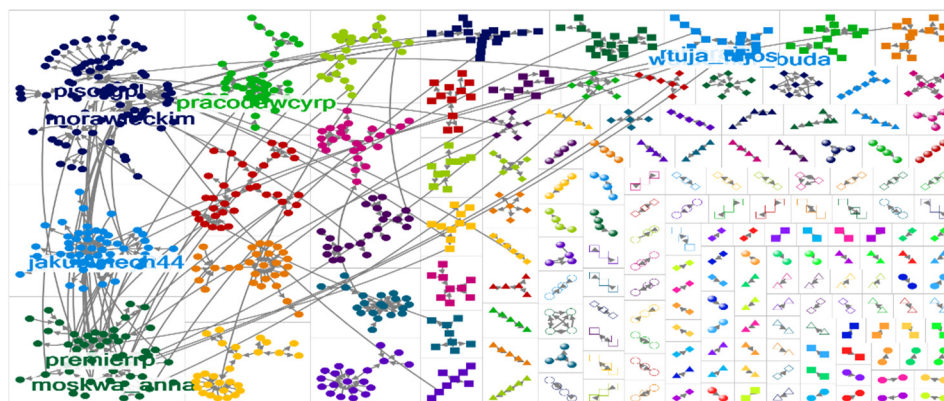

Polish, Sept. 21

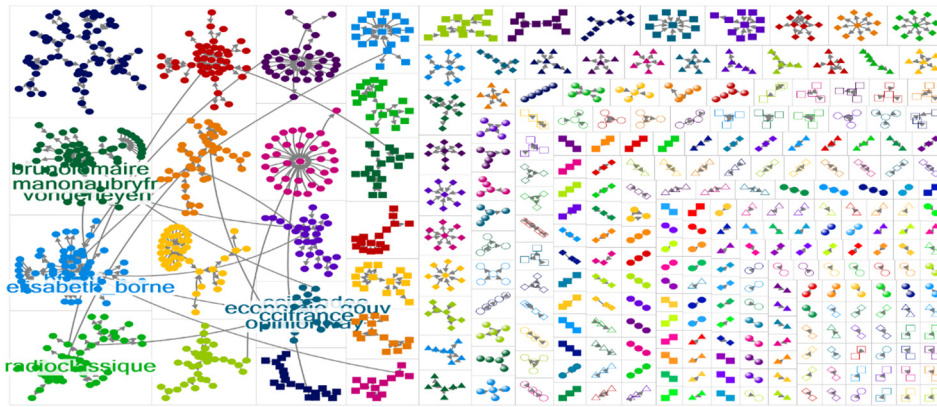

French, Sept. 28

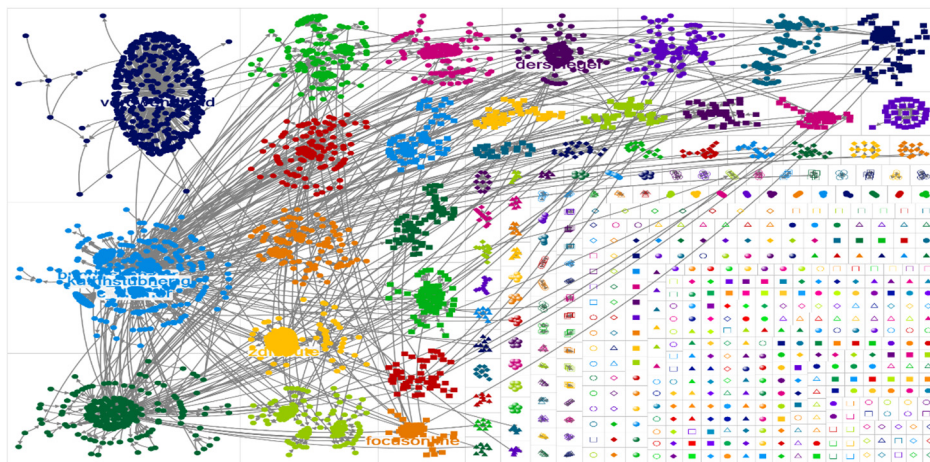

German, Sept. 28

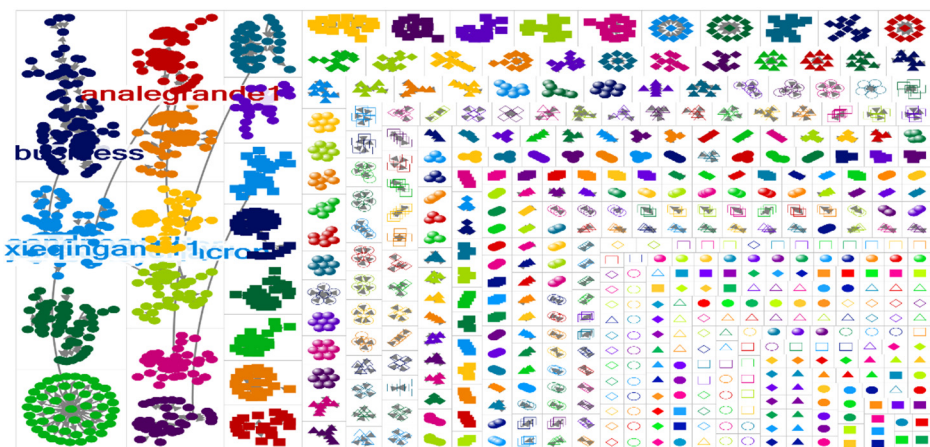

English, Sept. 28



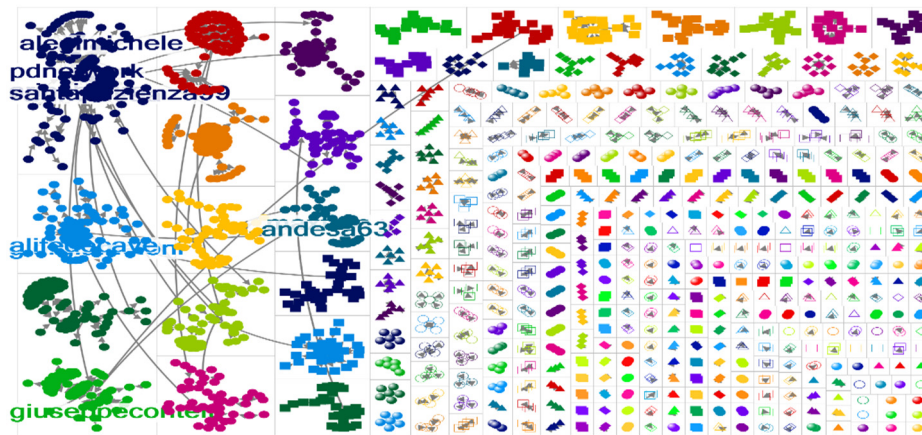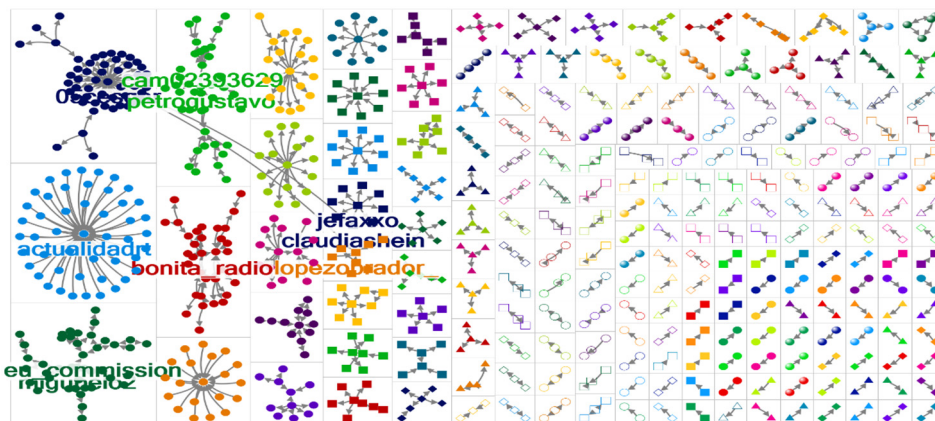

## 2. Visualizations of Semantic Networks of word pairs

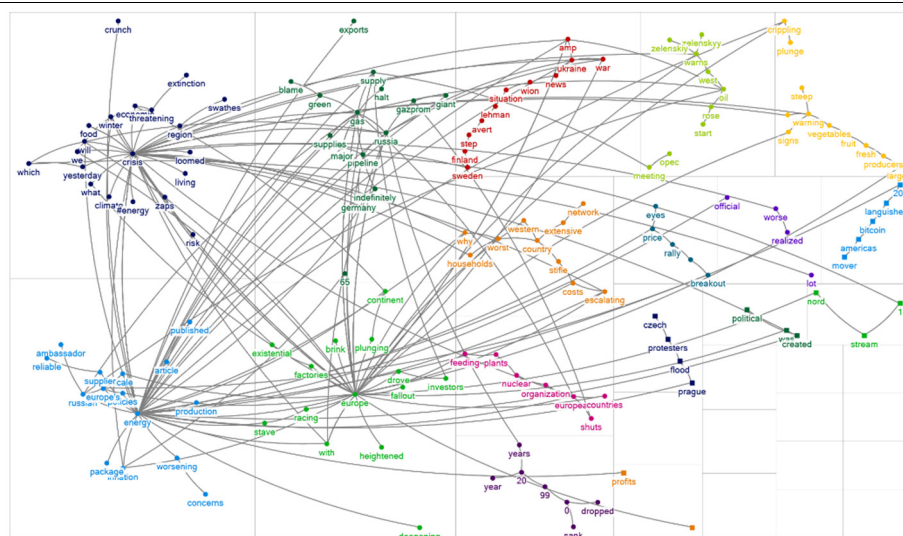

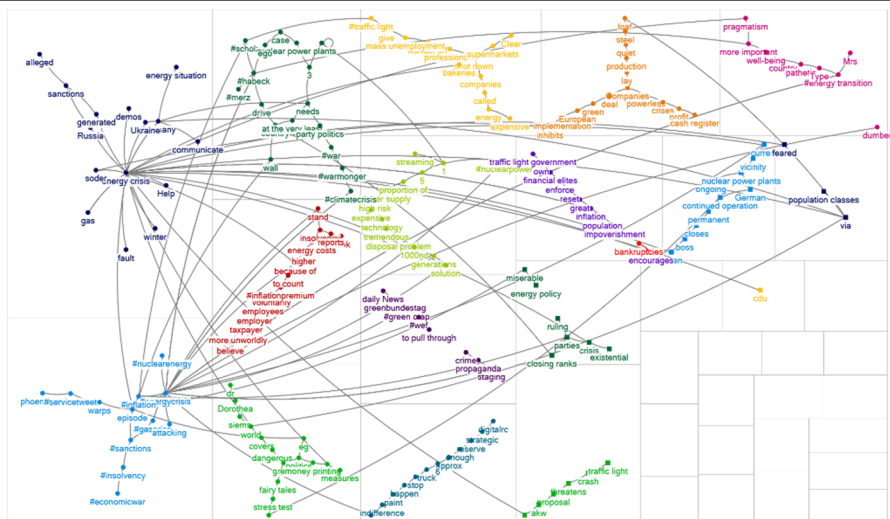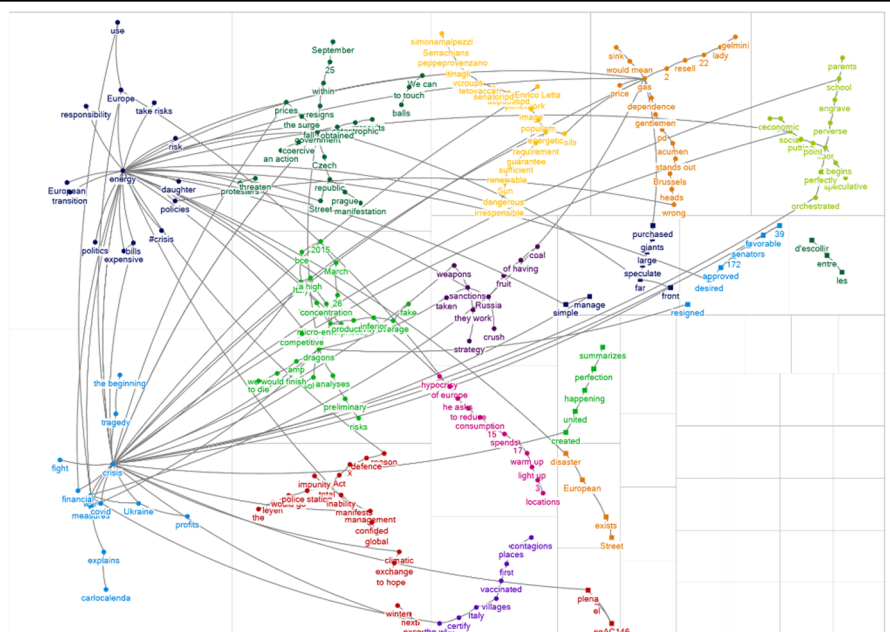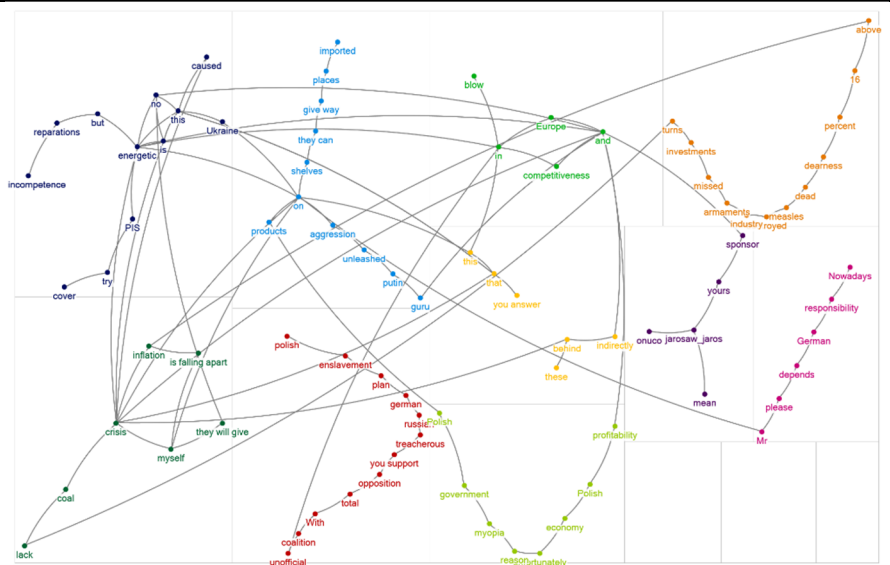



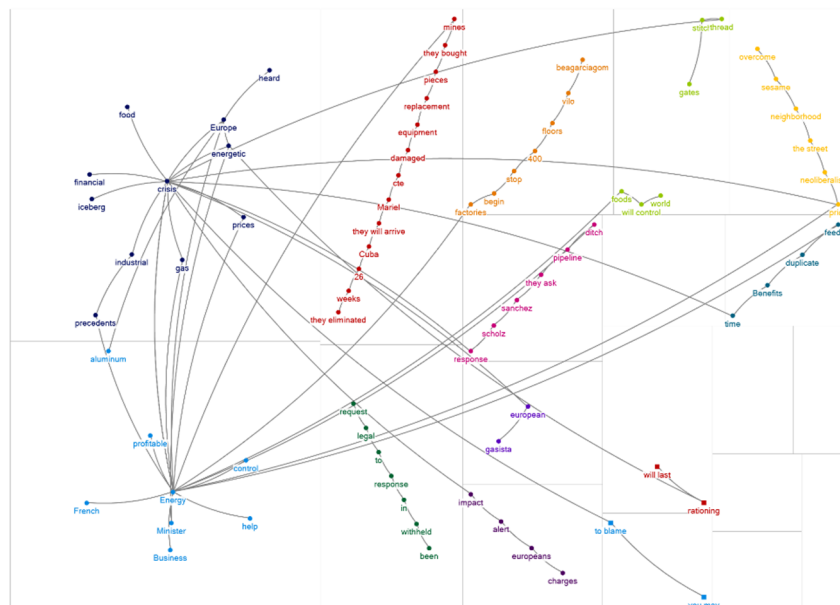

Spanish, Sept. 6

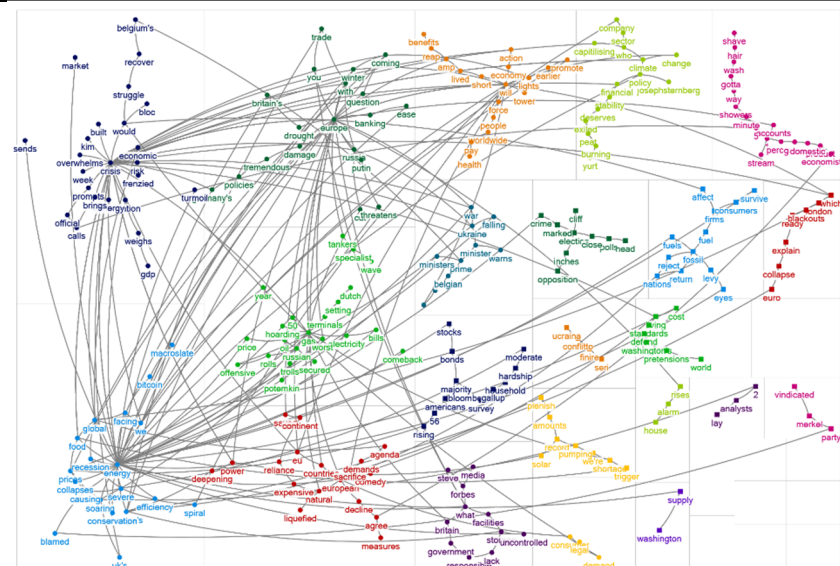

English, Sept. 13

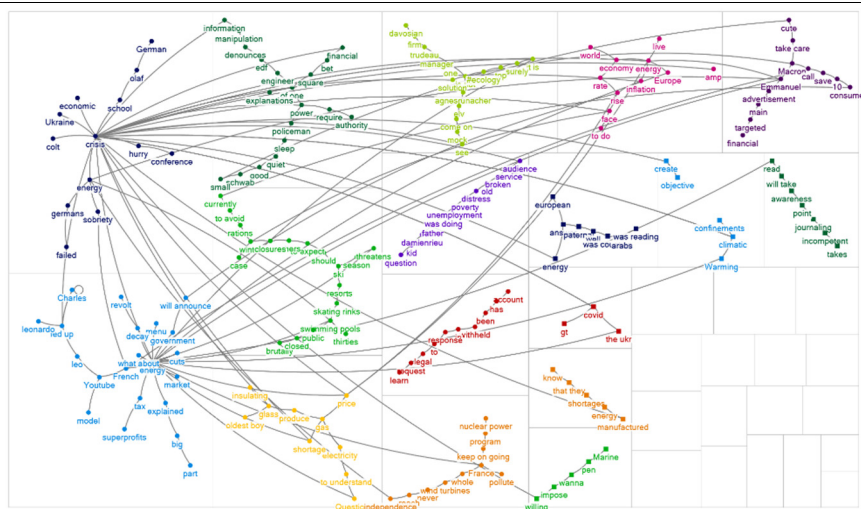

French, Sept. 13

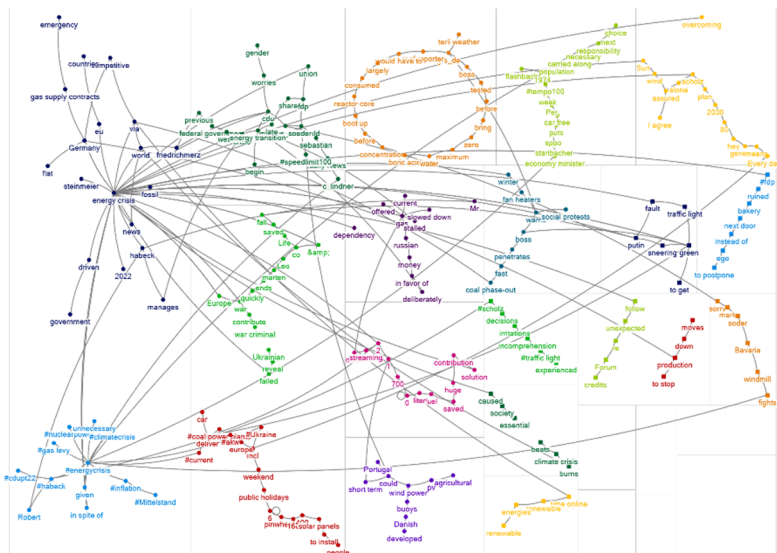

German, Sept. 13

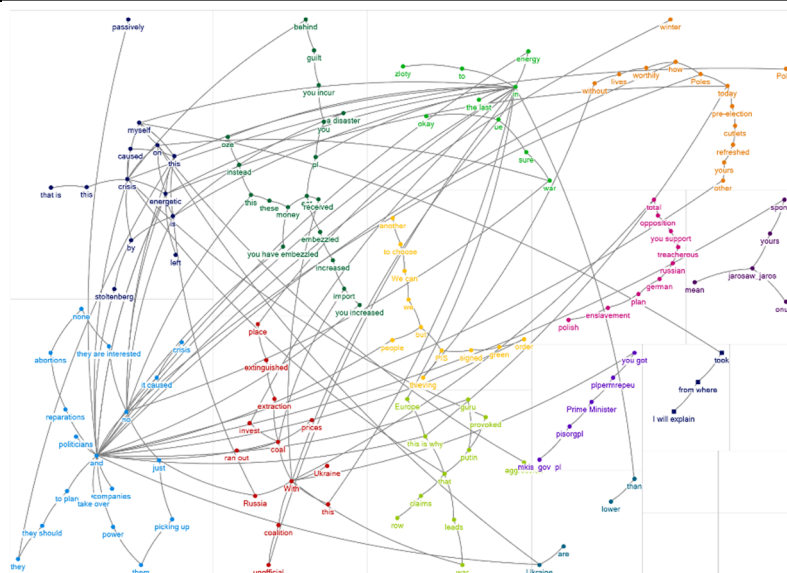

Polish, Sept. 13

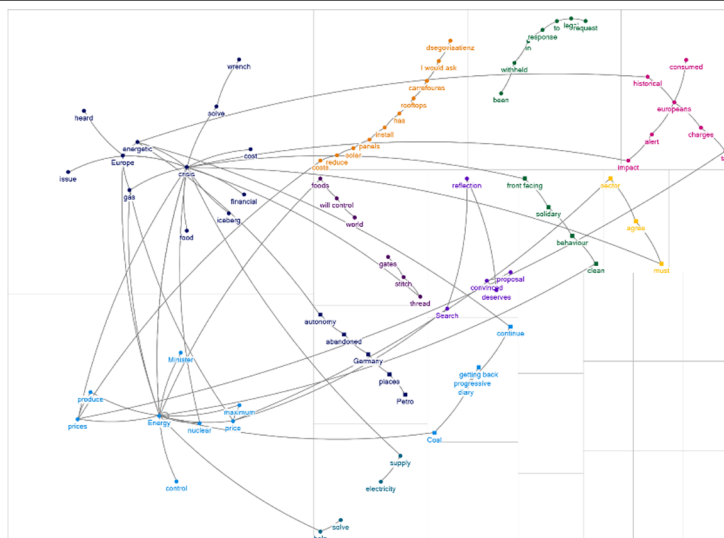

Spanish, Sept. 13



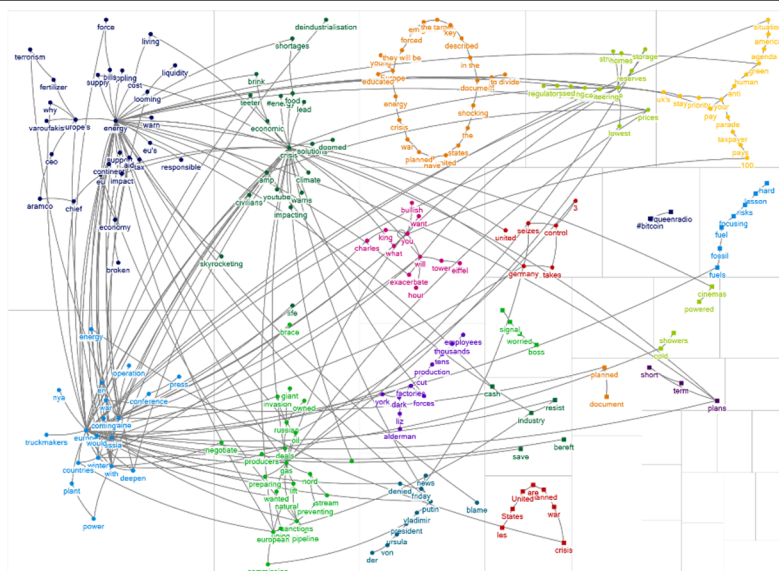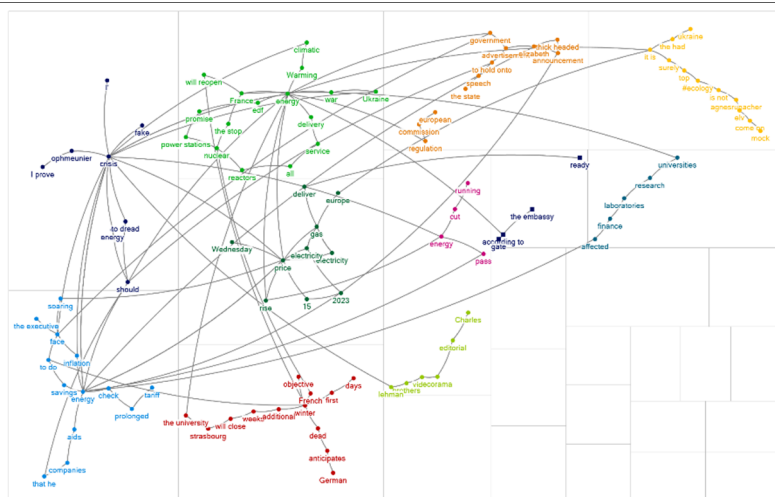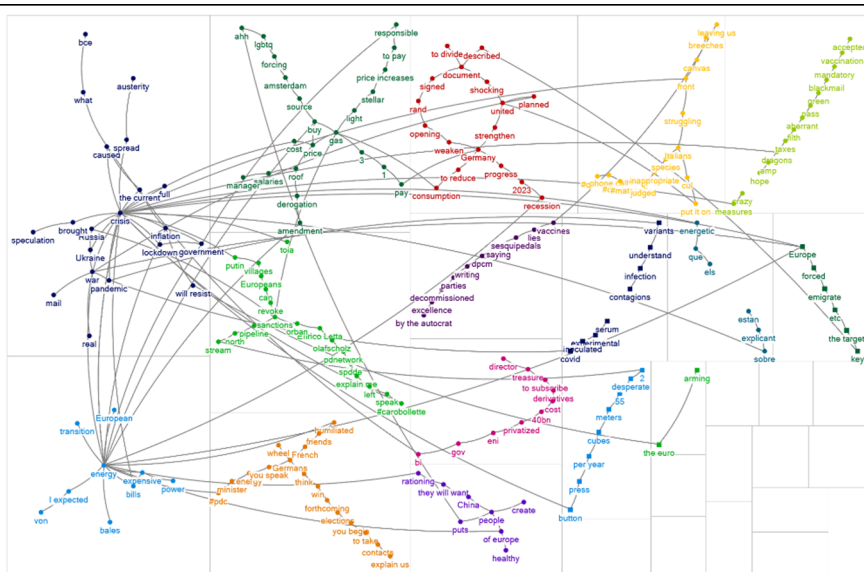

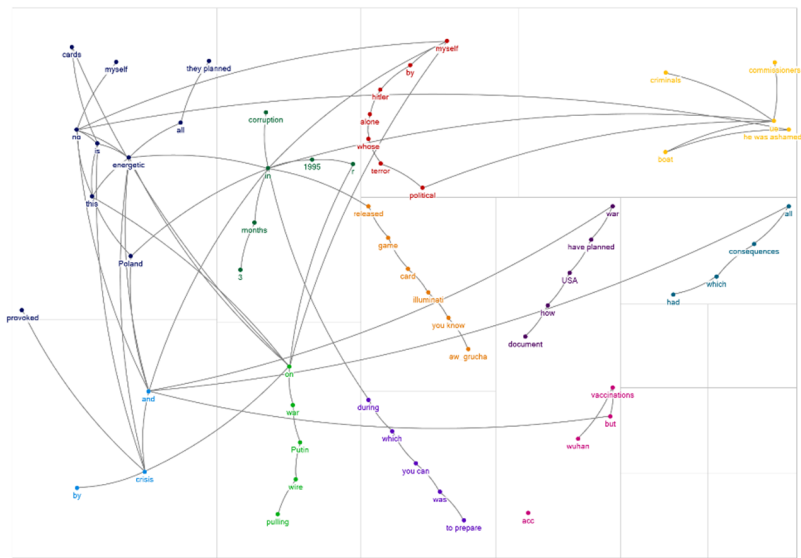

Polish, Sept. 21

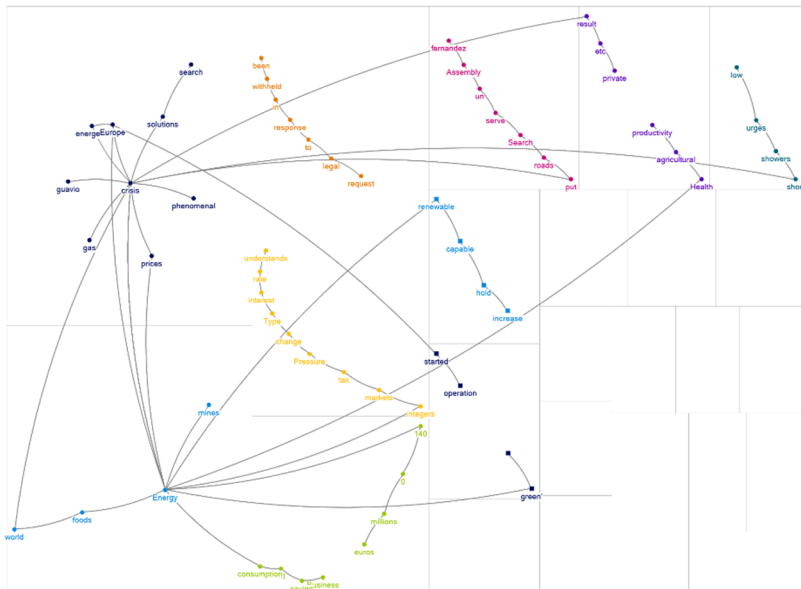

Spanish, Sept. 21

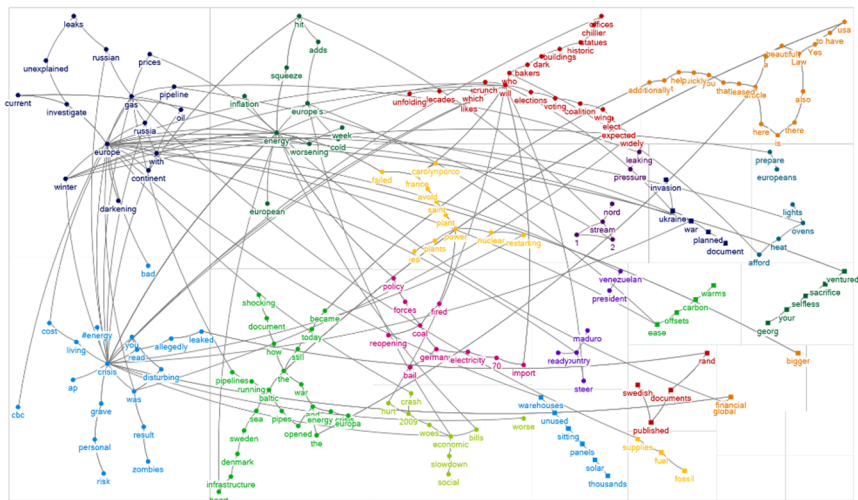

English, Sept. 28



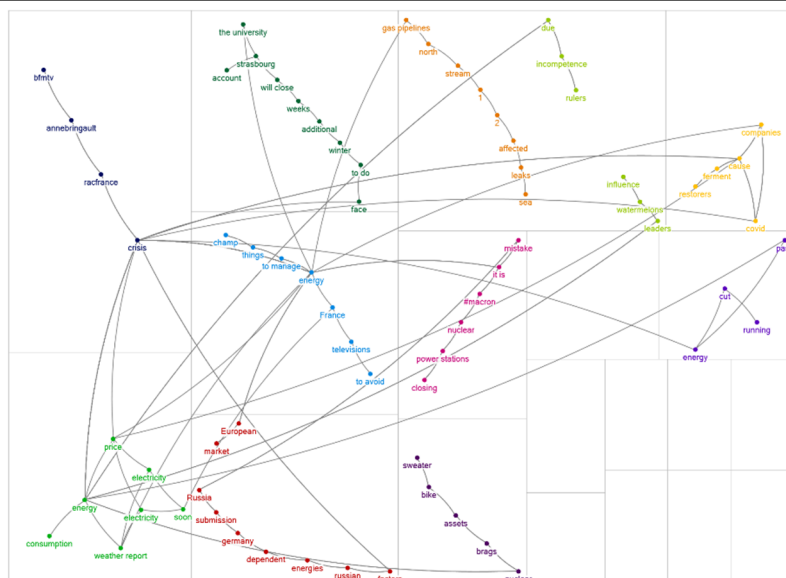

French, Sept. 28

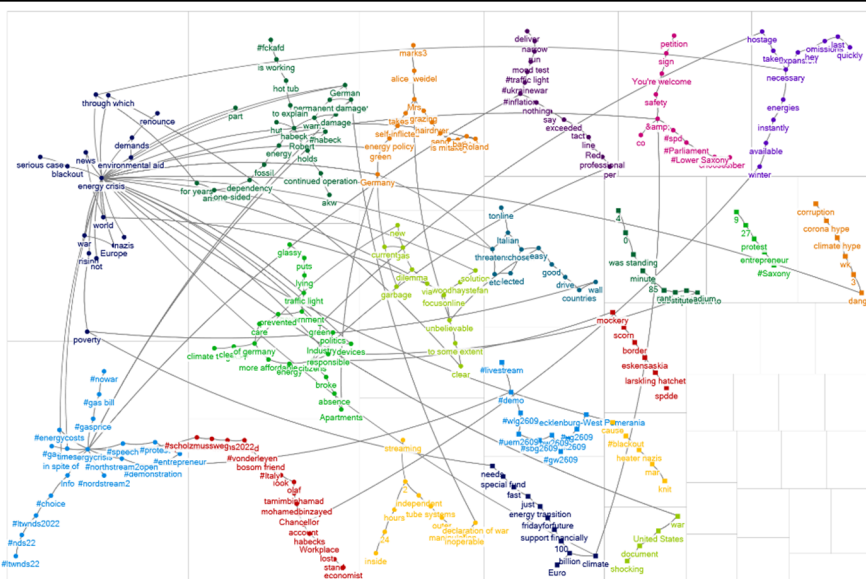

German, Sept. 28

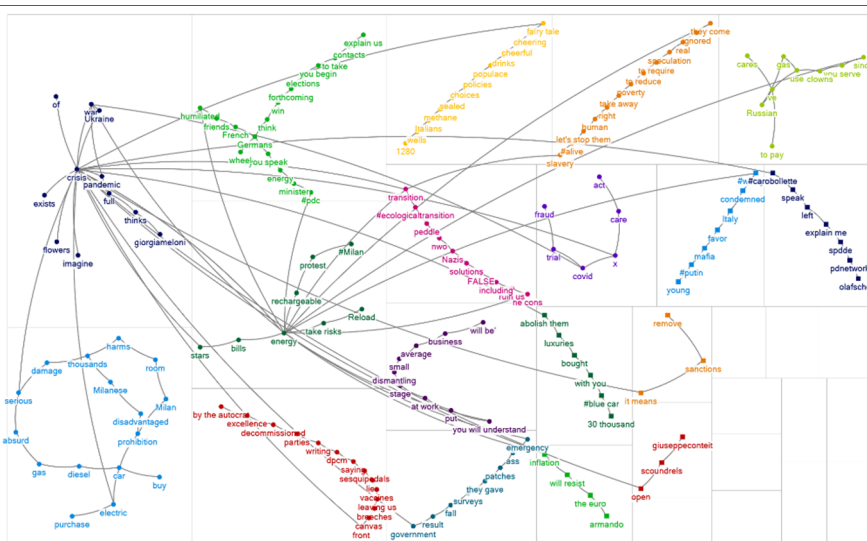

Italian, Sept. 28

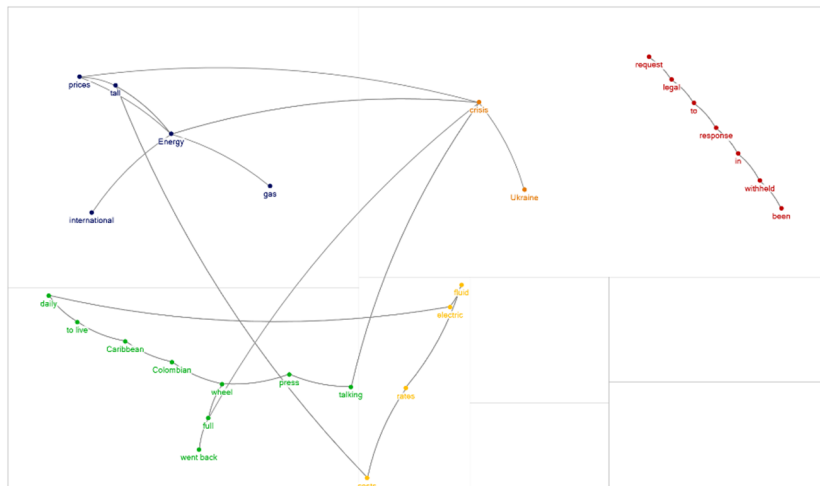

Spanish, Sept. 28
